# Supplementary material
Source: MDPI journal article supplement (https://www.mdpi.com/2227-9717/7/7/417)
Supplement: s1 [file s1]

Supplementary materials:

# Curcumin analogues with aldose reductase inhibitory activity: synthesis, biological evaluation, and molecular docking

DasharathKondhare<sup>1</sup>, Sushma Deshmukh<sup>1</sup> and Harshad Lade<sup>2,\*</sup>

<sup>1</sup> School of Chemical Sciences, Swami Ramanand Teerth Marathwada University, Nanded 431606, Maharashtra, India; [kondharedashrath@gmail.com](mailto:kondharedashrath@gmail.com) (D.K.); [dsschemistry@gmail.com](mailto:dsschemistry@gmail.com) (S.D.)

<sup>2</sup> Department of Environmental Engineering, Konkuk University, Seoul 05029, Korea

\* Correspondence: [harshadlade@gmail.com](mailto:harshadlade@gmail.com); Tel.: (+82-2-450-3905; Fax: +82-2-450-3542)

Scanned  $^1\text{H}$  NMR and IR spectral data of important synthesized compounds:

**IR Spectrum of compound 8a**

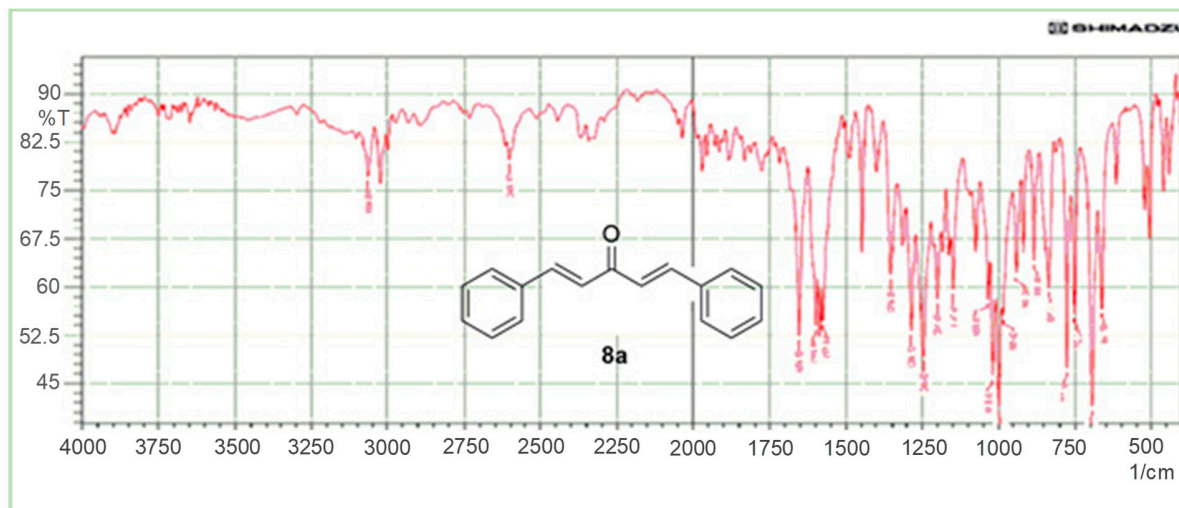

**$^1\text{H}$ NMR Spectrum of compound 8a**

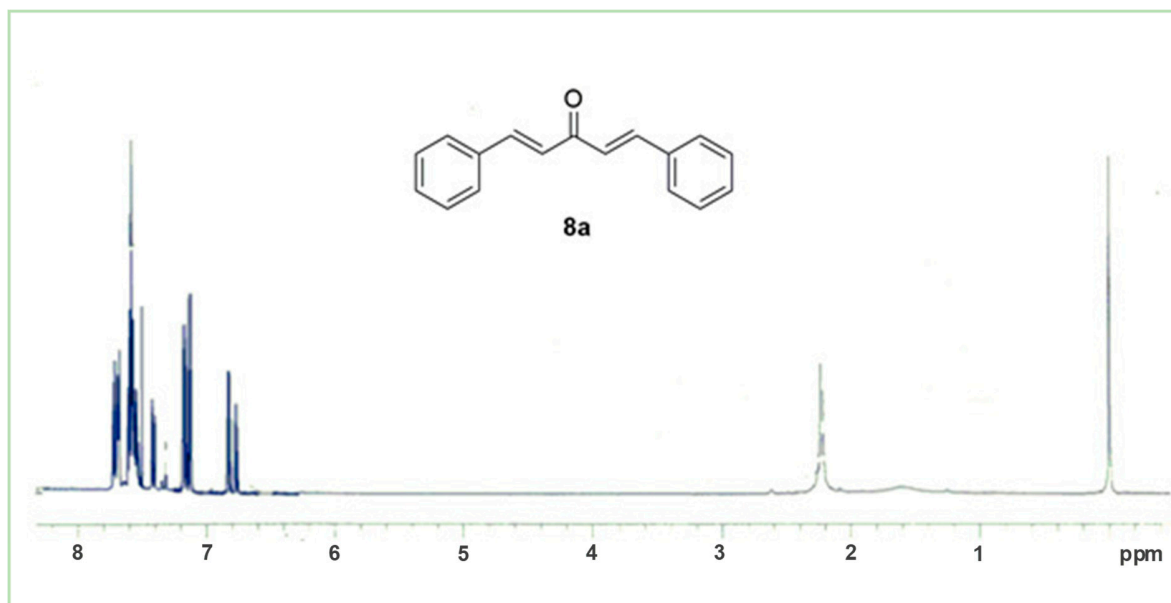

### IR Spectrum of compound 8b

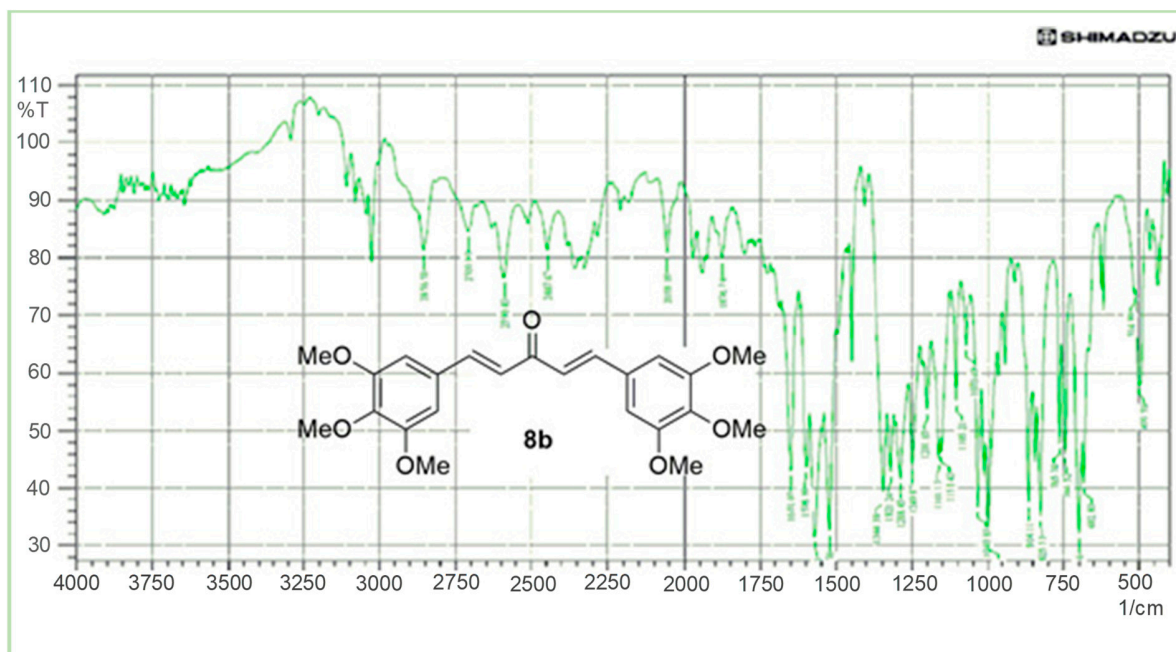

### <sup>1</sup>HNMR Spectrum of compound 8b

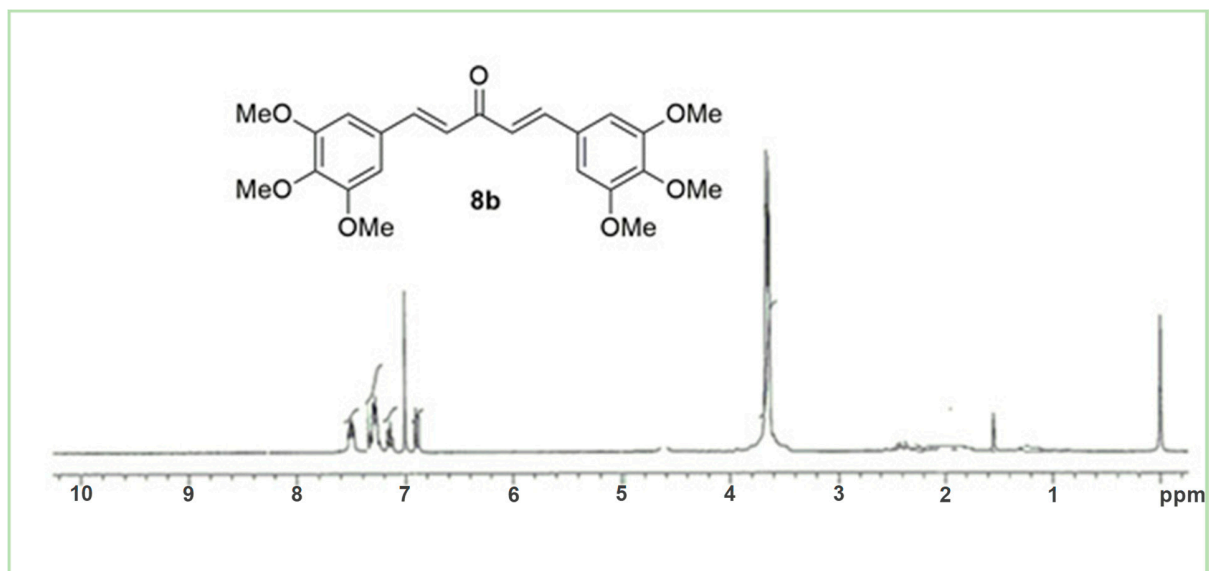

<sup>1</sup>HNMR Spectrum of compound 9a

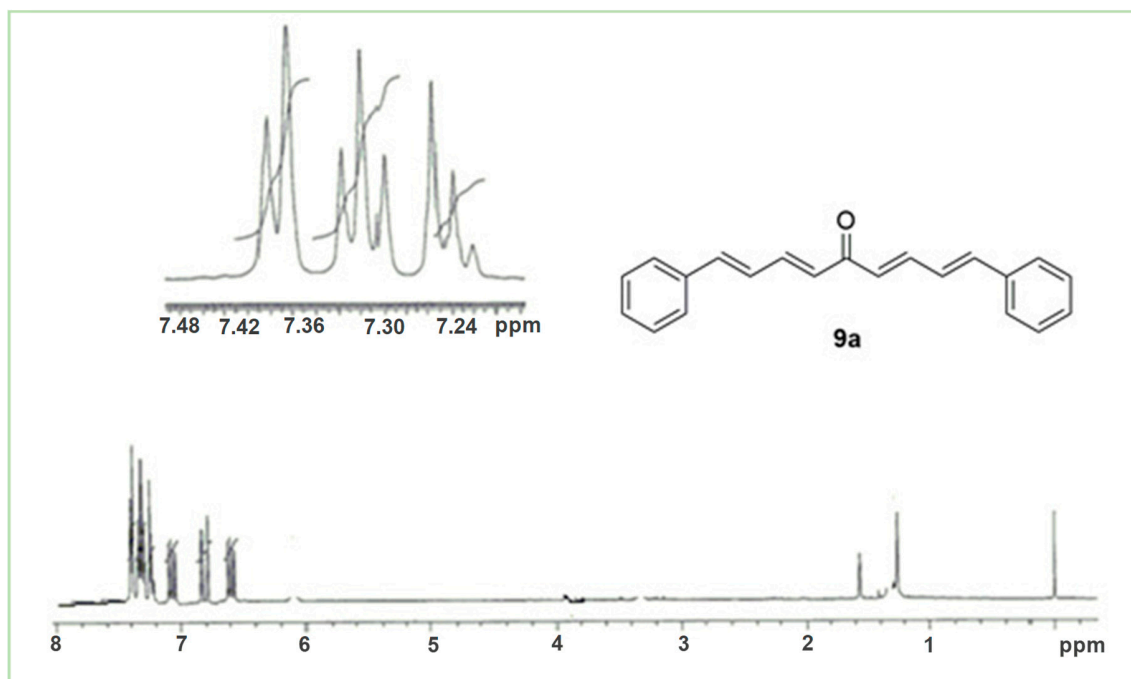

<sup>1</sup>HNMR Spectrum of compound 9b

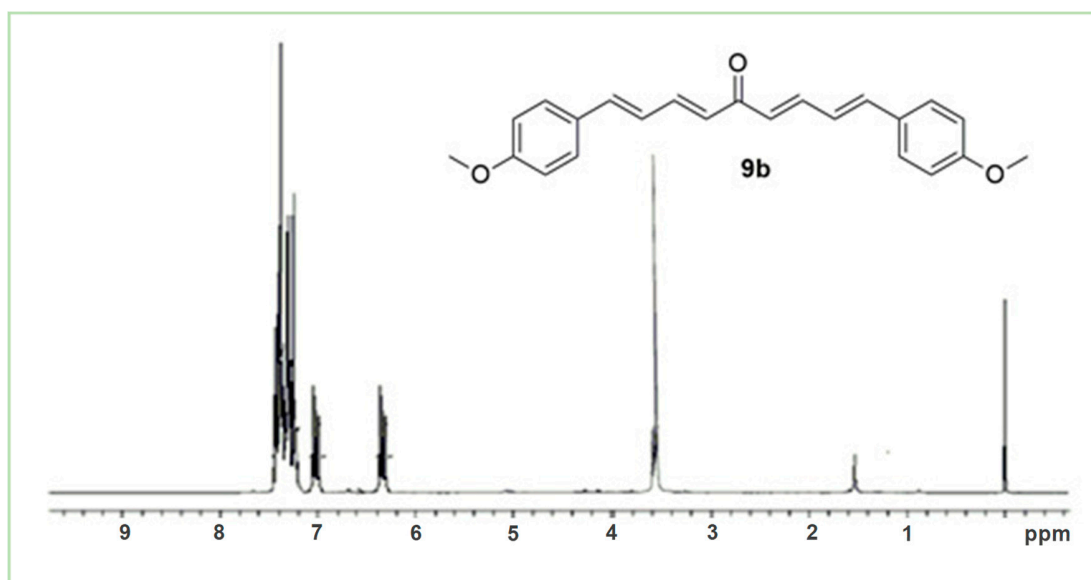

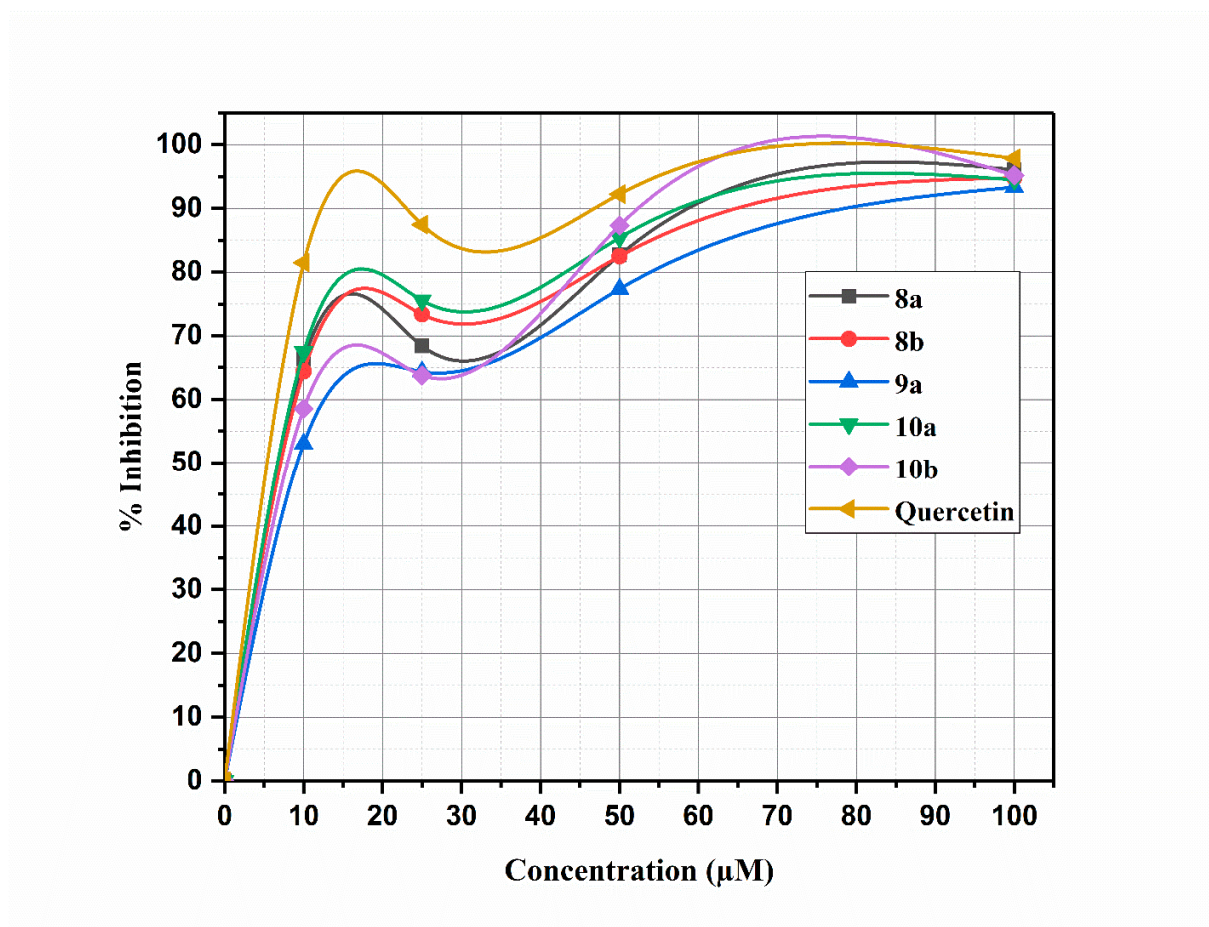

**Figure S1:** Dose response plot for compounds **8a**, **8b**, **9a**, **10a** and **10b** with standard quercetin.
